# Supplementary material
Source: PubMed Central journal article supplement (PMC2647848)
Supplement: NIHMS90955-supplement-1_si_001.pdf [file NIHMS90955-supplement-1_si_001.pdf]

Table S1: Sequence of primers used for cloning

| Primer          | Sequence                                                                                      | Purpose                                                                |
|-----------------|-----------------------------------------------------------------------------------------------|------------------------------------------------------------------------|
| nadAfor         | 5'-GCG GCG <u>TCC ATA TGA</u> GCG TAA TGT TTG<br>ATC CAG ACA CGG CG-3'                        | Forward Primer for cloning<br><i>E. coli nadA</i> <sup>a</sup>         |
| nadArev         | 5'-GCC <u>GGA ATT CTT</u> ATC CAC GTA GTG TAG<br>CCG CAA AAT CCA GC-3'                        | Reverse primer for cloning<br><i>E. coli nadA</i> <sup>b</sup>         |
| nadBfor         | 5'-GCG GCG <u>TCC ATA TGA</u> ATA CTC TCC CTG<br>AAC ATT CAT GTG ACG TGT TGA TTA TCG G-<br>3' | Forward Primer for cloning<br><i>E. coli nadB</i> <sup>a</sup>         |
| nadBrev         | 5'-GCG <u>CGA AGC TTT</u> TAT CTG TTT ATG TAA<br>TGA TTG CCG GGG GAA AGG ATC GAC GG-3'        | Reverse primer for cloning<br><i>E. coli nadB</i> <sup>c</sup>         |
| PhNadA.for.AEG  | 5'-CGC GGC GTC <u>CAT ATG</u> GAT TTA GTT GAA<br>GAA ATT TTG AGG CTT AAA GAG G-3'             | Forward Primer for cloning<br><i>P. horikoshii nadA</i> <sup>a</sup>   |
| PhNadA.rev.AEG  | 5'-CGC GGC GTC <u>GAA TTC</u> TCA TTT GCT CAT<br>CTC CAG CAT TCT TTC TAT GGC-3'               | Reverse primer for cloning<br><i>P. horikoshii nadA</i> <sup>b</sup>   |
| MTnadA.for      | 5'-CGC GGC GTC <u>CAT ATG</u> GTG CTG AAT CGC<br>ACG GAC ACG C-3'                             | Forward Primer for cloning<br><i>M. tuberculosis nadA</i> <sup>a</sup> |
| MTnadA.rev      | 5'-CGC GGC GTC <u>GAA TTC</u> TCA TTC GCC ACC<br>GCC GGG ATG CGG G-3'                         | Reverse primer for cloning<br><i>M. tuberculosis nadA</i> <sup>b</sup> |
| Cter3MtNadA.rev | 5'-CGC GGC GTC <u>CTC GAG</u> TCT TTC GCC ACC<br>GCC GGG ATG GCC G-3'                         | Reverse primer for cloning<br><i>E. coli nadA</i> <sup>d</sup>         |

<sup>a</sup> Underlined bases represent *NdeI* restriction site.

<sup>b</sup> Underlined bases represent *EcoRI* restriction site.

<sup>c</sup> Underlined bases represent *HindIII* restriction site.

<sup>d</sup> Underlined bases represent *XhoI* restriction site.

Table S2: Sequence of primers used for mutagenesis

| Primer       | Sequence                                                                 | Purpose                                 |
|--------------|--------------------------------------------------------------------------|-----------------------------------------|
| nadAcs291for | 5'-GGT GAG GGT GCA ACC <b>AGC</b> CGC AGC TGC GC-3'                      | Forward Primer for <i>E. coli</i> C291S |
| nadAcs291rev | 5'-GCG CAG CTG CGG <b>CTG</b> GTT GCA CCC TCA CC-3'                      | Reverse Primer for <i>E. coli</i> C291S |
| nadAcs294for | 5'-GGT GCA ACC TGC CGC AGC <b>AGC</b> GCG CAT TGT CC-3'                  | Forward Primer for <i>E. coli</i> C294S |
| nadAcs294rev | 5'-GGA CAA TGC GCG <b>CTG</b> CTG CGG CAG GTT GCA CC-3'                  | Reverse Primer for <i>E. coli</i> C294S |
| nadAcs297for | 5'-CGC AGC TGC GCG CAT <b>TCT</b> CCG TGG ATG GCC-3'                     | Forward Primer for <i>E. coli</i> C297S |
| nadAcs297rev | 5'-GGC CAT CCA CGG <b>AGA</b> ATG CGC GCA GCT GCG-3'                     | Reverse Primer for <i>E. coli</i> C297S |
| nadAcs64for  | 5'-CAG AAG AAA CCG GTG GCT <b>CTA</b> TTT CTG ATT CTC TGG-3'             | Forward Primer for <i>E. coli</i> C64S  |
| nadAcs64Rev  | 5'-CCA GAG AAT CAG AAA <b>TAG</b> AGC CAC CGG TTT CTT CTG-3'             | Reverse Primer for <i>E. coli</i> C64S  |
| nadAcs113For | 5'-GCC GAC ACT TCA GGC TGA <b>ATC</b> TTC ACT GGA TCT CGG-3'             | Forward Primer for <i>E. coli</i> C113S |
| nadAcs113Rev | 5'-CCG AGA TCC AGT GAA <b>GAT</b> TCA GCC TGA AGT GTC GGC-3'             | Reverse Primer for <i>E. coli</i> C113S |
| nadAcs119For | 5'-GGA TCT CGG <b>CAG</b> CCC TGT TGA AGA ATT TAA CGC-3'                 | Forward Primer for <i>E. coli</i> C119S |
| nadAcs119Rev | 5'-GCG TTA AAT TCT TCA ACA GGG <b>CTG</b> CCG AGA TCC-3'                 | Reverse Primer for <i>E. coli</i> C119S |
| nadAcs128For | 5'-CCC TGT TGA AGA AAT TAA CGC ATT <b>TAG</b> CGA TGC CCA TCC CGA TCG-3' | Forward Primer for <i>E. coli</i> C128S |
| nadAcs128Rev | 5'-CGA TCG GGA TGG GCA TCG <b>CTA</b> AAT GCG TTA AAT TCT TCA ACA GGG-3' | Reverse Primer for <i>E. coli</i> C128S |
| nadAcs195For | 5'-GGT GGA GAC ATT CTA <b>AGC</b> TGG CAG GGT GCC-3'                     | Forward Primer for <i>E. coli</i> C195S |
| nadAcs195Rev | 5'-GGC ACC CTG CCA <b>GCT</b> TAG AAT GTC TCC ACC-3'                     | Reverse Primer for <i>E. coli</i> C195S |
| nadAcs200For | 5'-GCT GGC AGG GTG CCT <b>CTA</b> TTG TGC ATG ATG AAT TTA AGA CTC AGG-3' | Forward Primer for <i>E. coli</i> C200S |

|                  |                                                                             |                                            |
|------------------|-----------------------------------------------------------------------------|--------------------------------------------|
| nadAcs200Rev     | 5'-CCT GAG TCT TAA ATT CAT CAT GCA CAA<br><b>TAG AGG</b> CAC CCT GCC AGC-3' | Reverse Primer for <i>E. coli</i><br>C200S |
| nadAc113afor.AHS | 5'-GCC GAC ACT TCA GGC TGA <b>AGC TTC</b> ACT<br>GGA TCT CGG-3'             | Forward Primer for <i>E. coli</i><br>C113A |
| nadAc113arev.AHS | 5'-CCG AGA TCC AGT GAA <b>GCT</b> TCA GCC TGA<br>AGT GTC GGC-3'             | Reverse Primer for <i>E. coli</i><br>C113A |
| nadAc200afor.AHS | 5'-GCT GGC AGG GTG <b>CCG CTA</b> TTG TGC ATG<br>ATG AAT TTA AGA CTC AGG-3' | Forward Primer for <i>E. coli</i><br>C200A |
| nadAc200arev.AHS | 5'-CCT GAG TCT TAA ATT CAT CAT GCA CAA<br><b>TAG CGG</b> CAC CCT GCC AGC-3' | Reverse Primer for <i>E. coli</i><br>C200A |
| nadAc297afor.AHS | 5'-CGC AGC TGC GCG CAT <b>GCT</b> CCG TGG ATG<br>GCC-3'                     | Forward Primer for <i>E. coli</i><br>C297A |
| nadAc297arev.AHS | 5'-GGC CAT CCA CGG <b>AGC</b> ATG CGC GCA GCT<br>GCG-3'                     | Reverse Primer for <i>E. coli</i><br>C297A |

---

Bolded bases represent amino acid changes.
